# Supplementary material
Source: Springer Nature journal article supplement (https://www.springermedizin.de/resource/supplementary/12913_2011_2084_MOESM4_ESM.pdf/9529776)
Supplement: MOESM4 [file 9529776]

EVPI £ millions

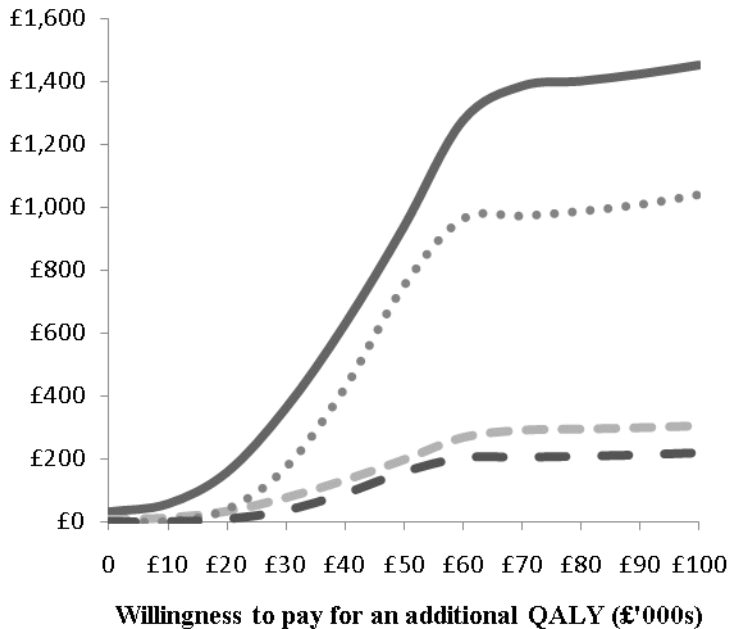

- 10-year population
- - 2-year population
- ... 10-year relative eff
- - 2-year relative eff

EVPI £ millions



- 10-year population
- - 2-year population
- ... 10-year relative eff
- - ● 2-year relative eff
